# Supplementary material
Source: Springer Nature journal article supplement (https://www.springermedizin.de/resource/supplementary/12879_2009_1244_MOESM1_ESM.pdf/9442170)

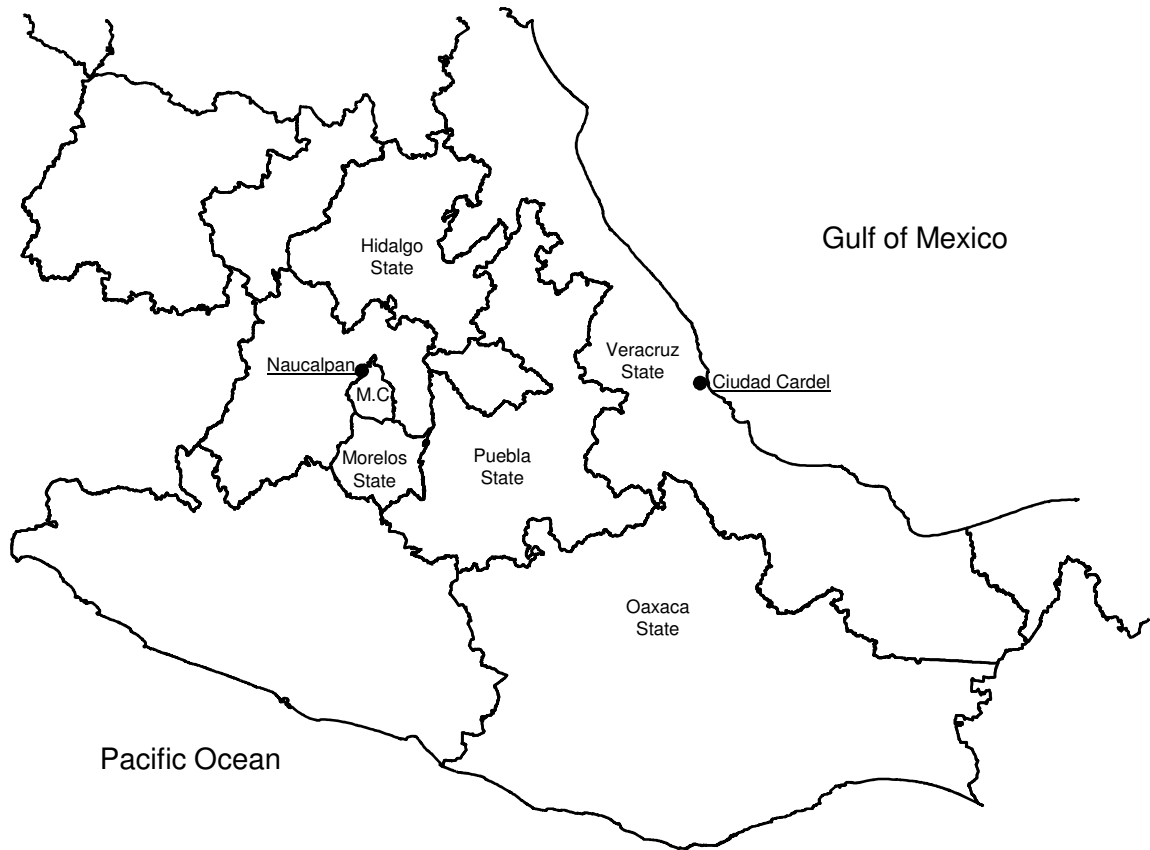

Supplement: MOESM1 [file 9442170]
